# Supplementary material for: Band structure engineering in highly degenerate tetrahedrites through isovalent doping
Source: Royal Society of Chemistry journal article supplement (doi:10.1039/c6ta07015a), 2016-01-01
Supplement: c6ta07015a1.pdf [file c6ta07015a1.pdf]

## Support Information

### Band Structure Engineering in Highly Degenerate Tetrahedrites Through Isovalent Doping

Xu Lu,<sup>\*,1</sup> Wei Yao,<sup>1</sup> Guiwen Wang,<sup>2</sup> Xiaoyuan Zhou,<sup>\*,1,2</sup> Donald Morelli,<sup>3</sup>

Yongsheng Zhang,<sup>\*,4</sup> Hang Chi,<sup>5</sup> Si Hui<sup>5</sup> and Ctirad Uher<sup>5</sup>

1. *College of Physics, Chongqing University, Chongqing 401331, P. R. China*
2. *Analytical and Testing Center of Chongqing University, Chongqing 401331, P. R. China*
3. *Department of Chemical Engineering & Materials Science, Michigan State University, East Lansing, Michigan 48824 United States*
4. *Key Laboratory of Materials Physics, Institute of Solid State Physics, Chinese Academy of Sciences, Hefei 230031, P. R. China*
5. *Department of Physics, University of Michigan, Ann Arbor, Michigan 48109, United States*

#### Figure captions

Figure S1: The XRD patterns of  $\text{Cu}_{12}\text{Sb}_4\text{S}_{13-x}\text{Se}_x$  solid solutions ( $x = 0, 0.5, 1, 2$ ).

Figure S2: The zoom-in images of band structure of  $\text{Cu}_{12}\text{Sb}_4\text{S}_{13-x}\text{Se}_x$  (a:  $x = 0$ ; b:  $x = 1$ ; c:  $x = 2$ ).

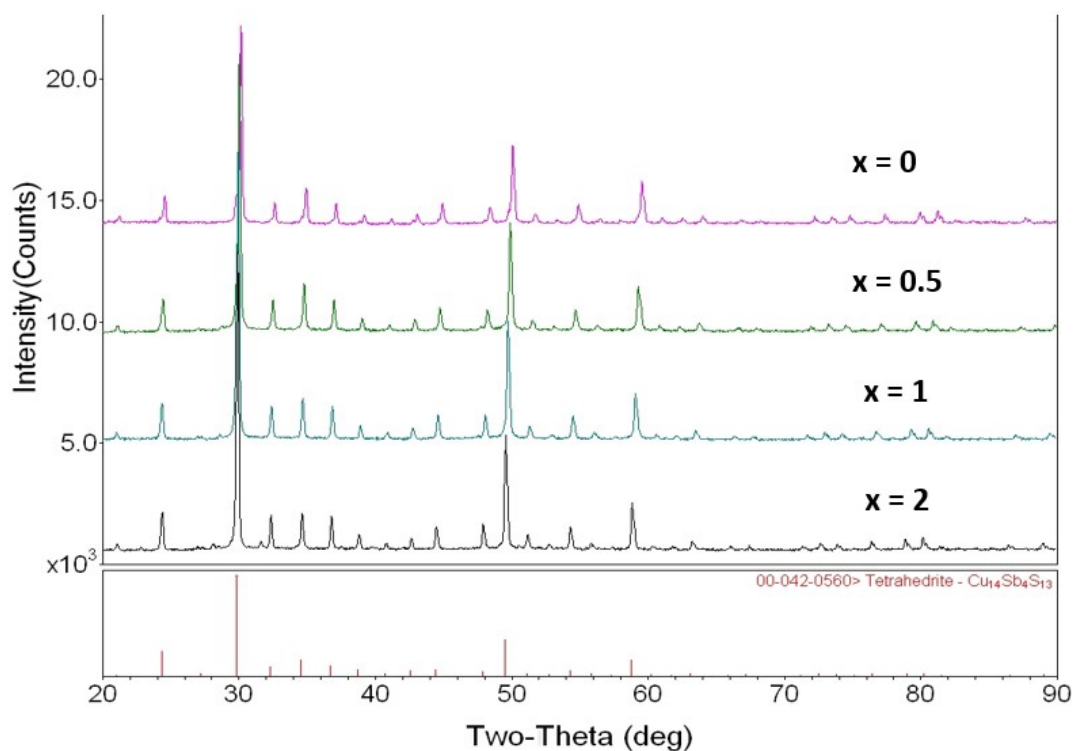

Figure S1

The powder XRD patterns of  $\text{Cu}_{12}\text{Sb}_4\text{S}_{13-x}\text{Se}_x$  solid solutions ( $x = 0, 0.5, 1, 2$ ) were obtained using a Rigaku Miniflex II bench-top X-ray diffractometer and analyzed by a JADE 5.0 software. The results indicated that the tetrahedrite structure is well kept until  $x = 2$  in spite of a tiny portion of second phase is observed for  $x = 2$  sample.

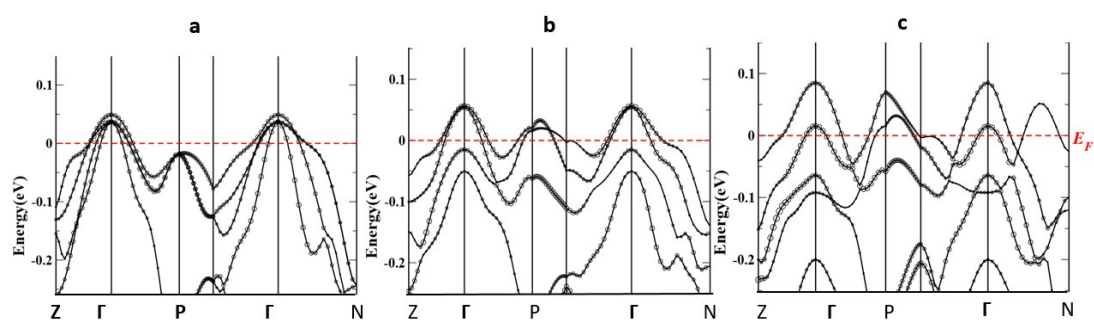

Figure S2

From the enlarged images, we clearly see the evolution of the top of valence band upon Se doping that more bands take part in the electrical transport.
